# Supplementary material for: Mechanism of internalization of MDA-7/IL-24 protein and its cognate receptors following ligand-receptor docking
Source: PubMed Central journal article supplement (PMC6707942; doi:10.18632/oncotarget.27150), 2019-08-20
Supplement: oncotarget-10-5103-s001.pdf [file oncotarget-10-5103-s001.pdf]

## Mechanism of internalization of MDA-7/IL-24 protein and its cognate receptors following ligand-receptor docking

### SUPPLEMENTARY MATERIALS

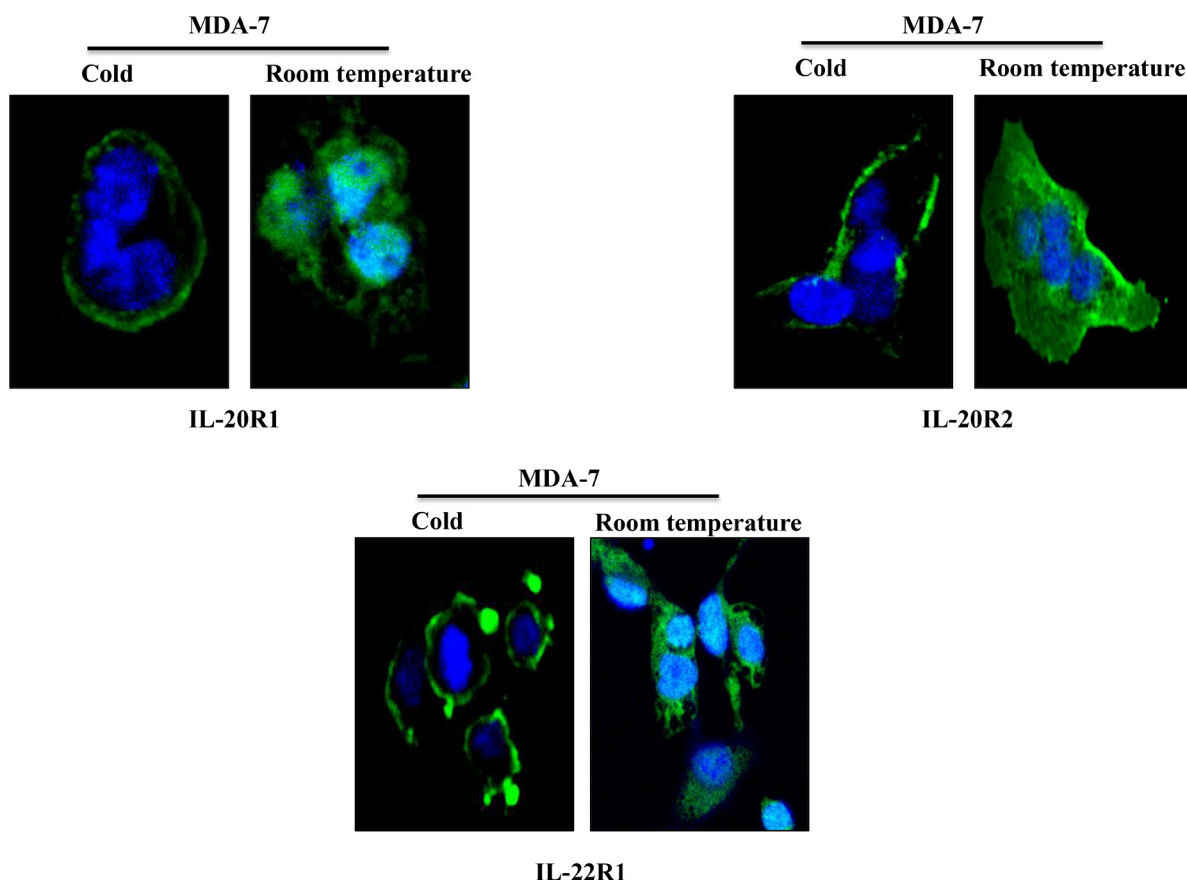

**Supplementary Figure 1: Internalization of receptors upon MDA-7/IL-24 treatment:** DU-145 cells were treated with His-MDA-7/IL-24 (10 µg/mL) on ice or at room temperature for 1 hr. Cells were then fixed and stained with respective antibodies followed by confocal microscopy.

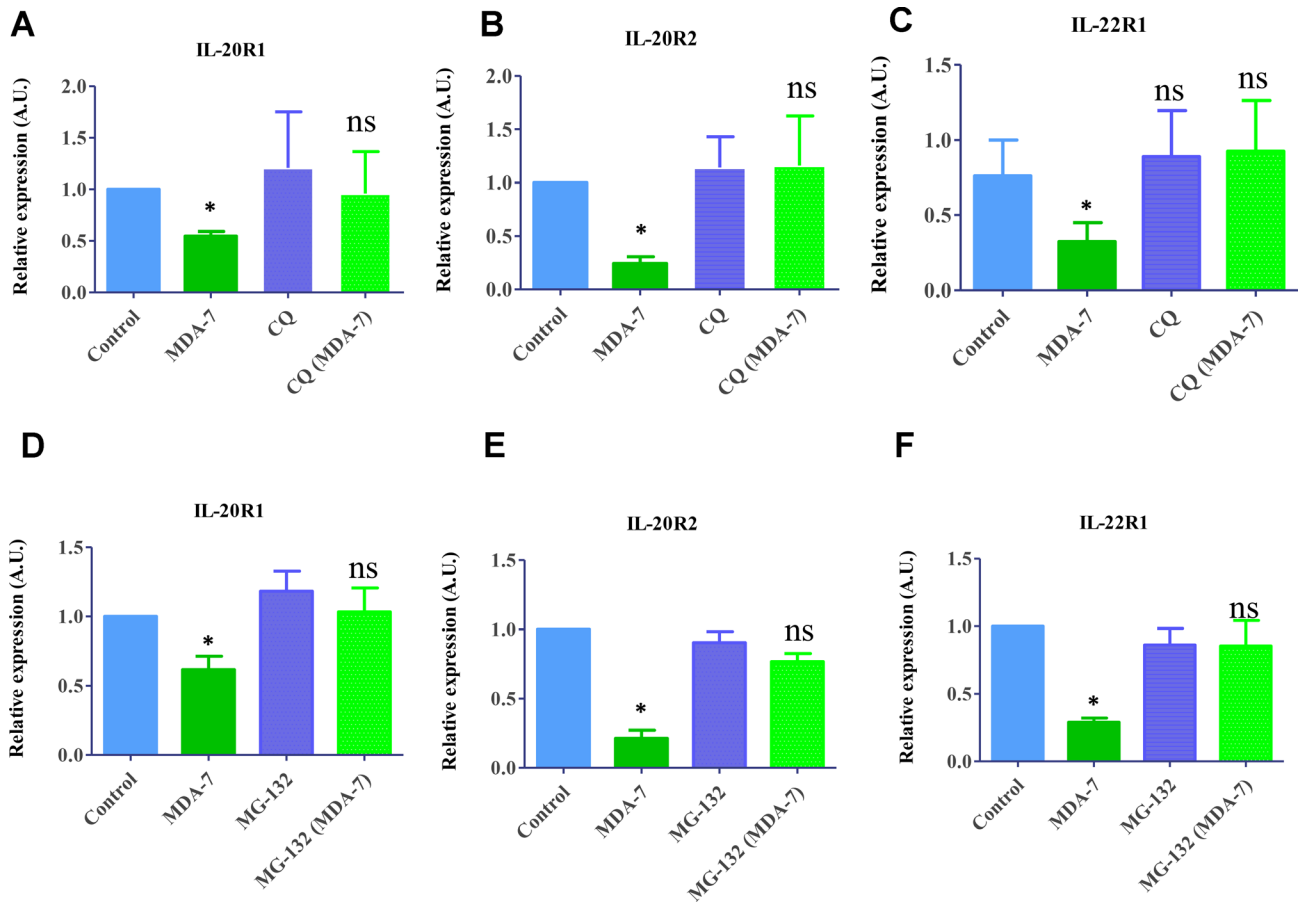

**Supplementary Figure 2: Quantification of the Western blots shown in Figure 2D.** Western blot images in Figure 2D were quantified using Image J software. \* $P < 0.05$ , ns: not significant.

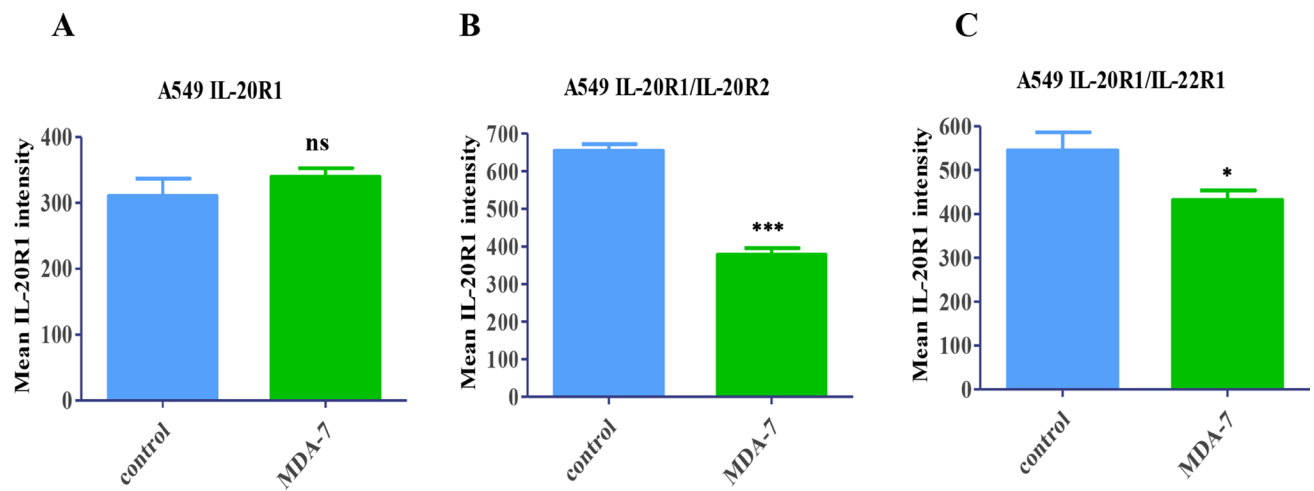

**Supplementary Figure 3: Degradation of receptors upon internalization.** A549 cells were transfected with vectors expressing either IL-20R2 or IL-22R1 and treated with His-MDA-7/IL-24 (10  $\mu\text{g}/\text{mL}$ ) for 24 hr. (A) Flow cytometry analysis revealed that there was no change in the total IL-20R1 after treatment with His-MDA-7/IL-24 in parental A549 cells without transfection. With transfection of IL-20R2 (B) and treatment with His-MDA-7/IL-24 (10  $\mu\text{g}/\text{mL}$ ) for 24 hr, a decrease in the total IL-20R1 expression was observed. (C) IL-22R1 was transfected and His-MDA-7/IL-24 (10  $\mu\text{g}/\text{mL}$ ) was added for 24 hr. Analysis of IL-20R1 expression showed that there was a decrease in the IL-20R1 expression. \* $P < 0.05$ , \*\*\* $P < 0.001$ , ns: not significant.

**A**

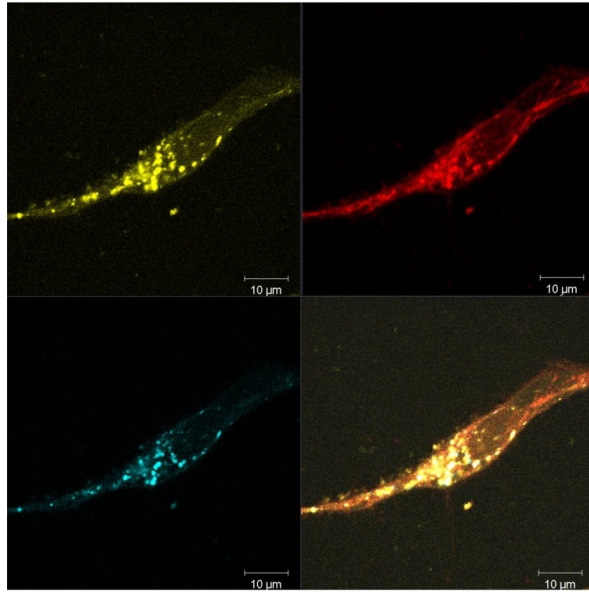

**YFP-IL-20R1/CFP-IL-20R2**

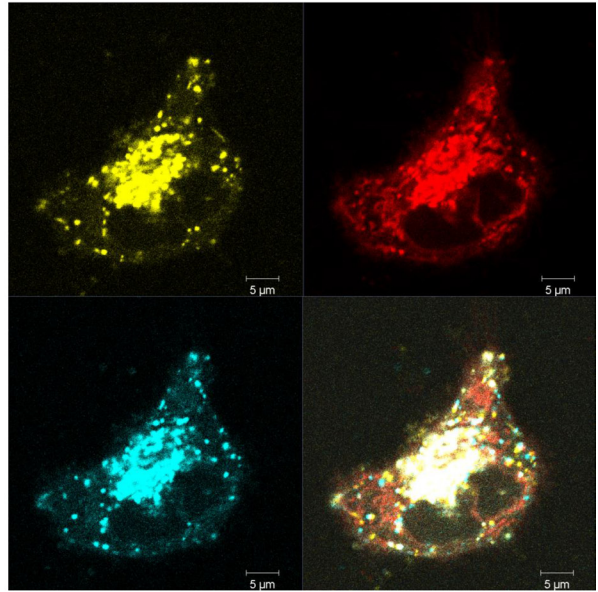

**YFP-IL-20R1/CFP-IL-22R1**

**B**

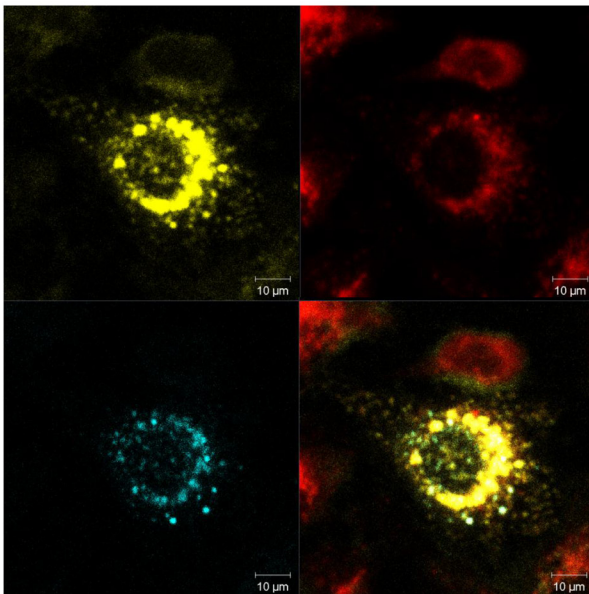

**YFP-IL-20R1/CFP-IL-20R2**

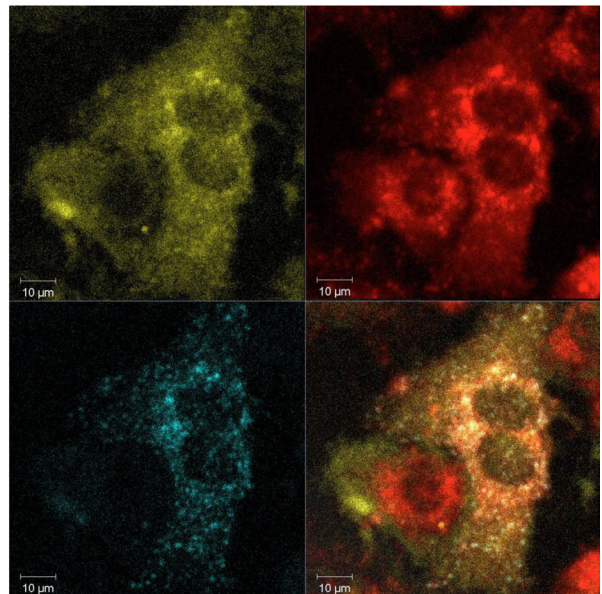

**YFP-IL-20R1/CFP-IL-22R1**

**Supplementary Figure 4: Colocalization of receptors with lysosomes.** (A) HeLa cells were transfected with YFP-IL-20R1 and CFP-IL-20R2 or CFP-IL-22R1 and treated with His-MDA-7/IL-24 (10  $\mu\text{g}/\text{mL}$ ) for 24 hr. Image analysis showed that the receptors colocalized with lysosomes, which stained with Lysotracker red. (B) LAMP1 staining was done to study the colocalization of the receptors with lysosomes.

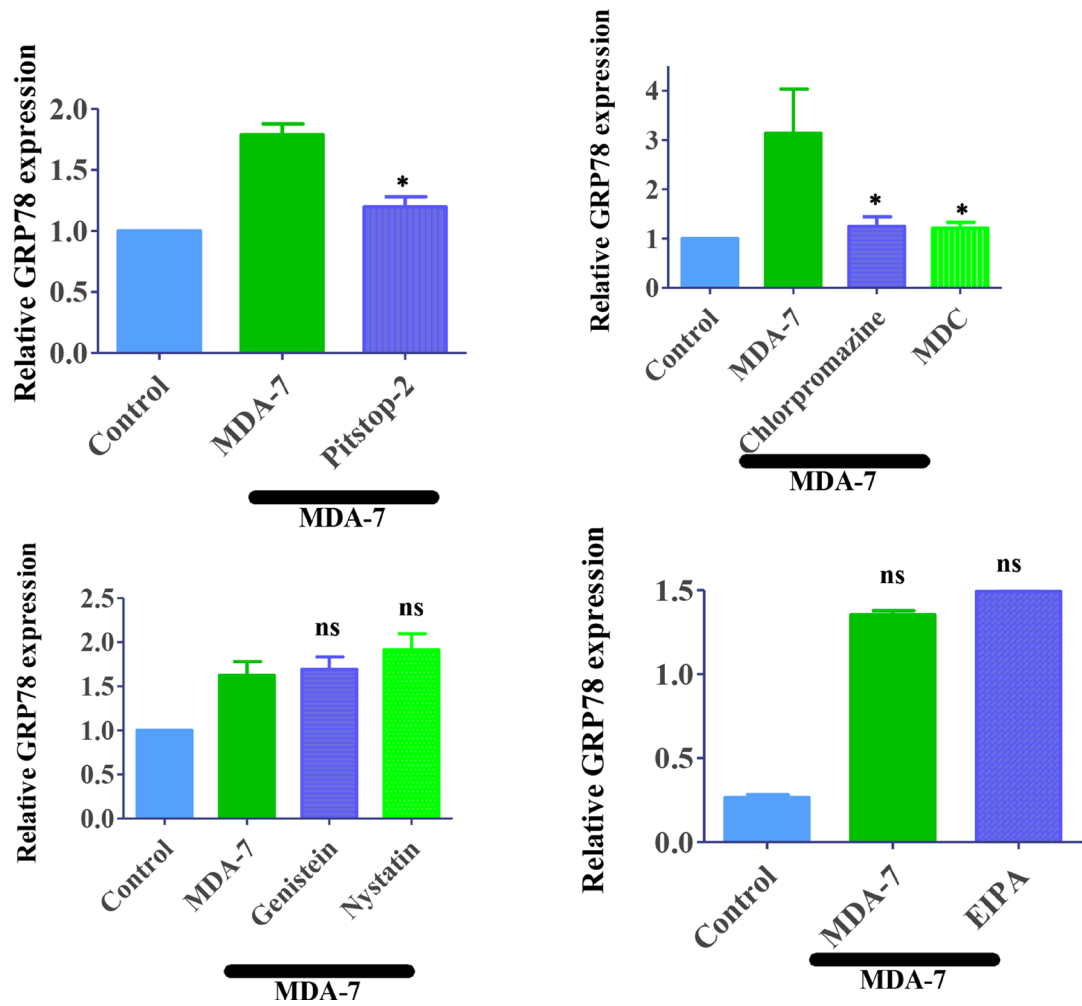

**Supplementary Figure 5: Quantification of the Western blots shown in Figure 3B, 3D, 3F, and 3H.** Western blot images in Figure 3B, 3D, 3F, and 3H were quantified using Image J software. \* $P < 0.05$ , ns: not significant.
